# Supplementary material for: The acoustic properties, syllable structure, and syllable sequences of ultrasonic vocalizations (USVs) during neonatal opioid withdrawal in FVB/N mouse substrains
Source: PubMed Central journal article supplement — bioRxiv. 2024 Nov 7:2024.11.06.622304. Preprint. [Version 1] doi: 10.1101/2024.11.06.622304 (PMC11580921; doi:10.1101/2024.11.06.622304), 2024-11-07

# Figure S1

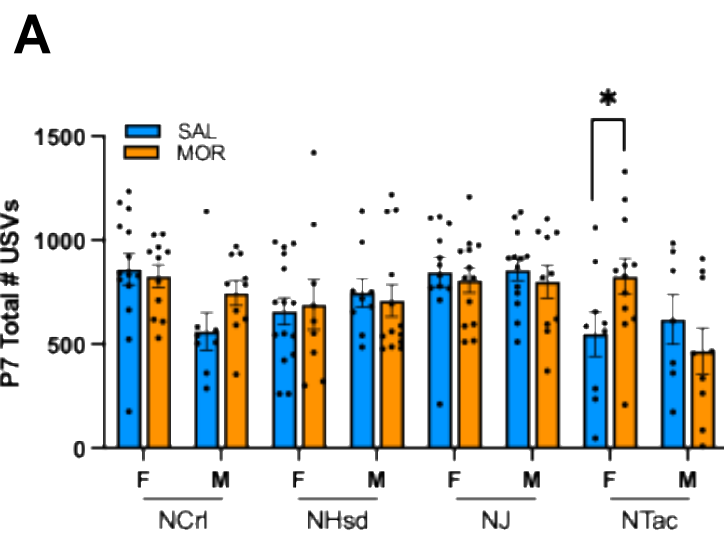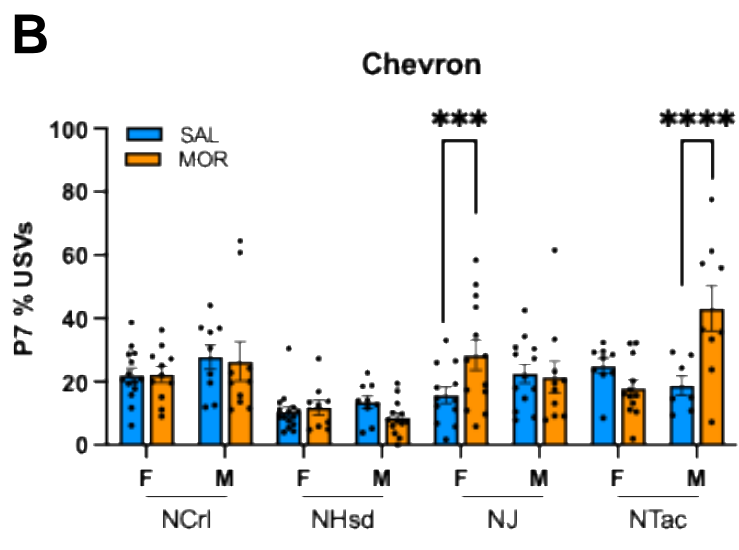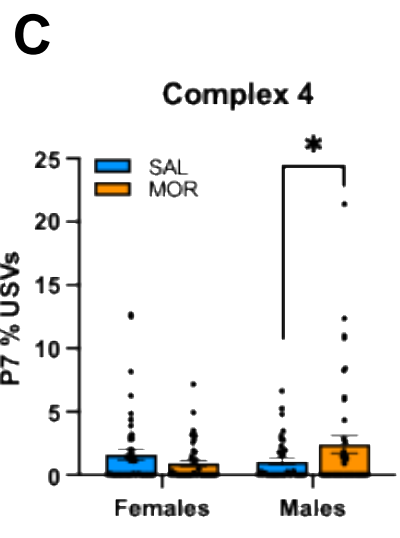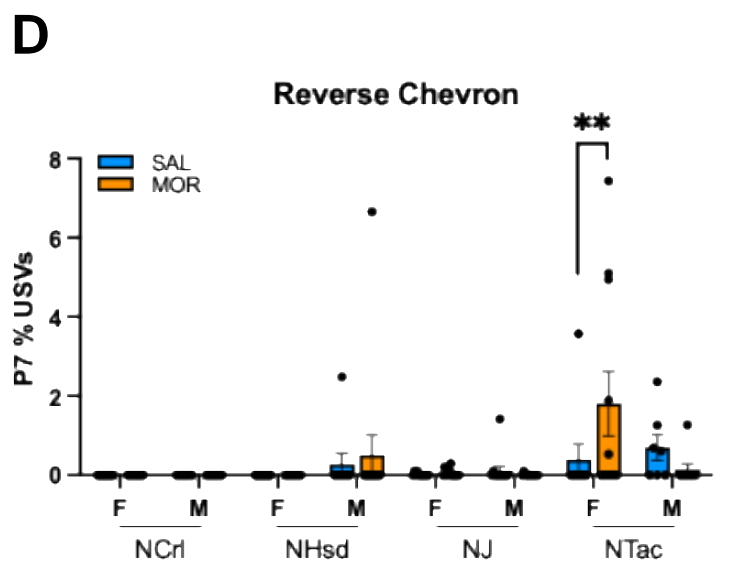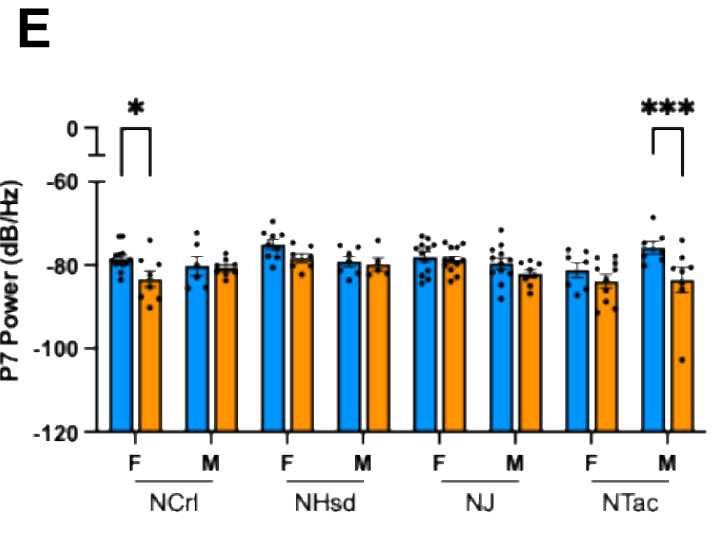

# Figure S2

## A

### Downward

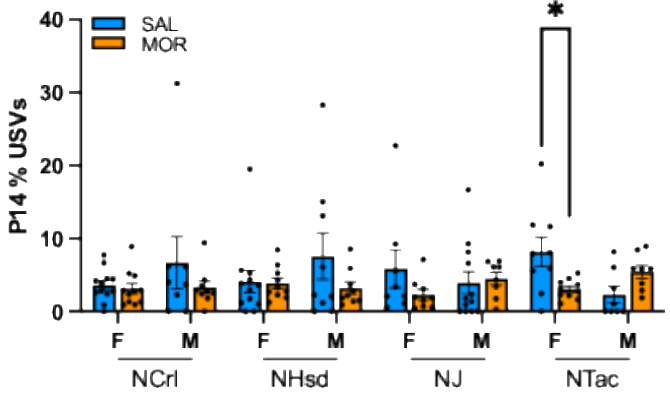

## B

### Upward

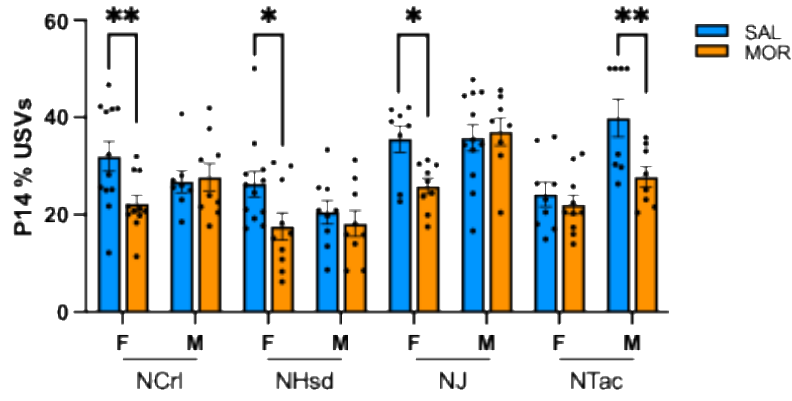

# Figure S3

**A**

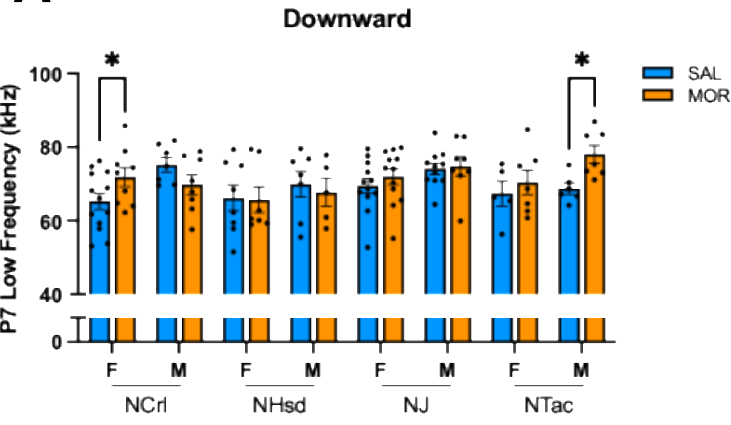

**B**

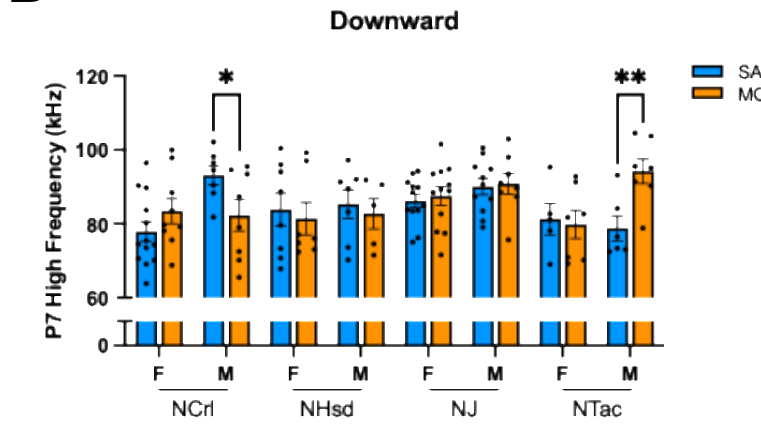

**C**

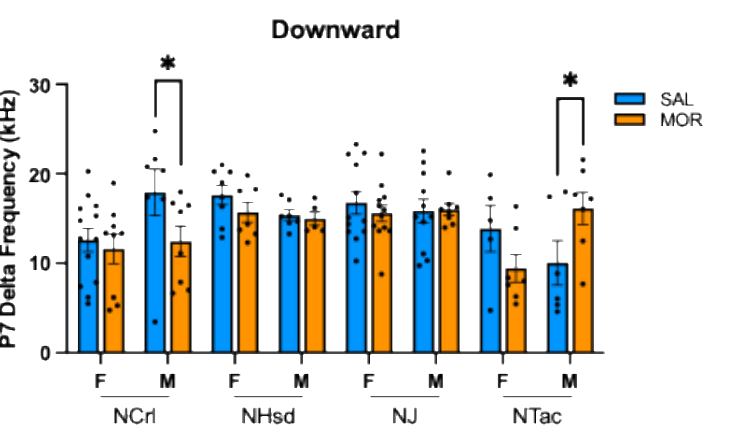

**D**

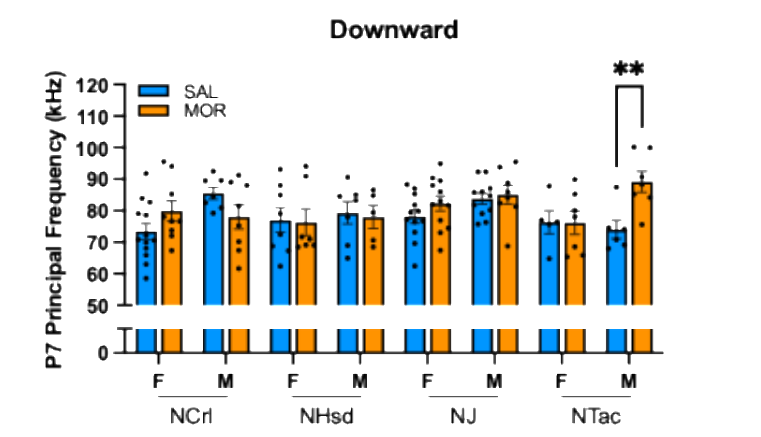

**E**

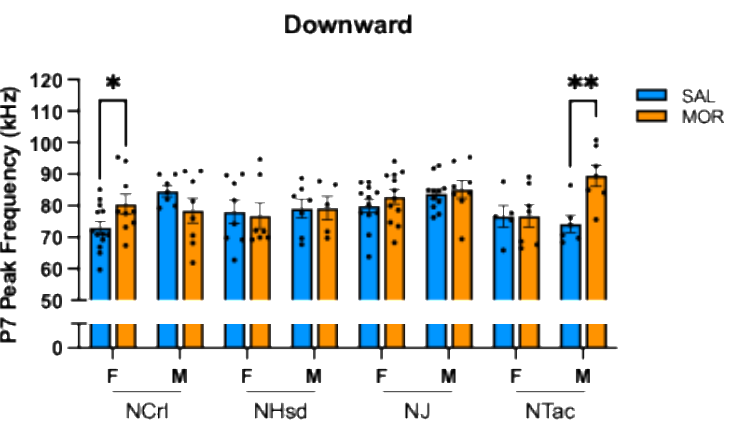

**F**

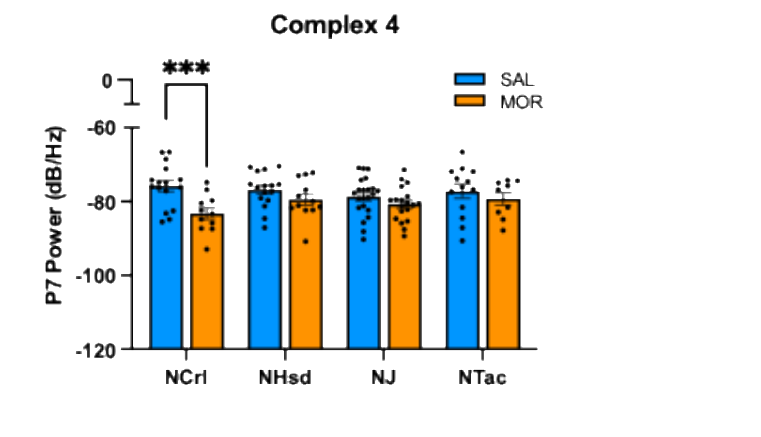

**G**

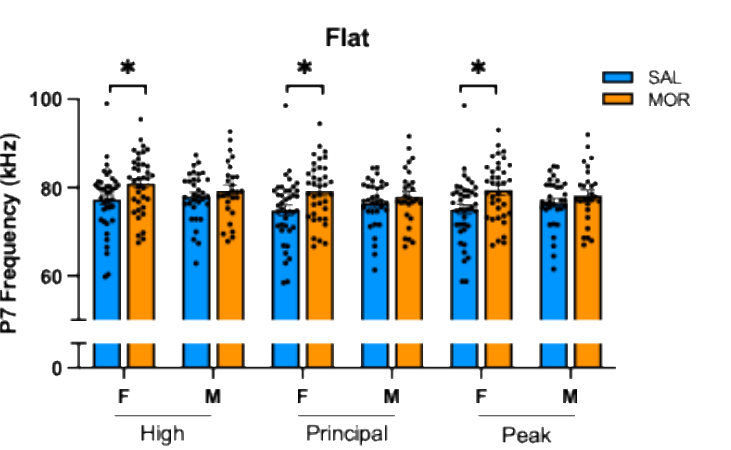

**H**

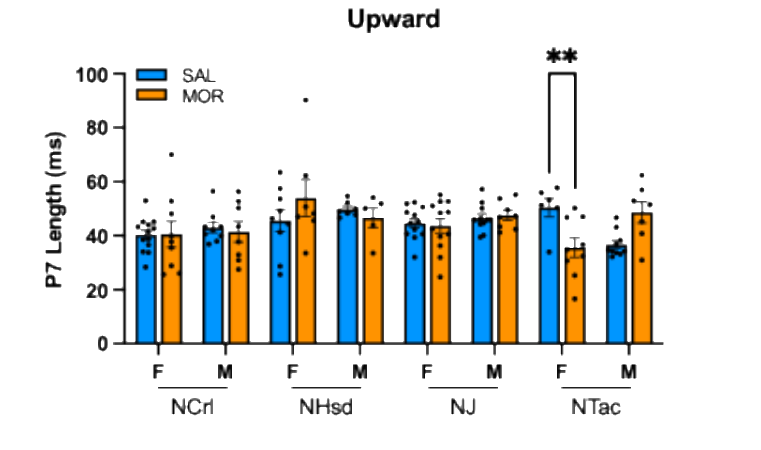

# Figure S4

**A**

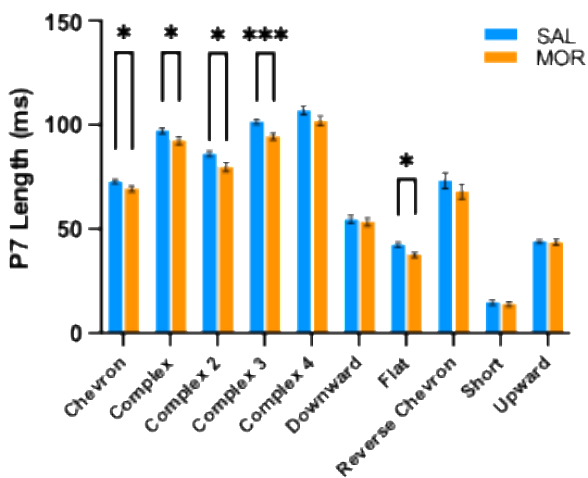

**B**

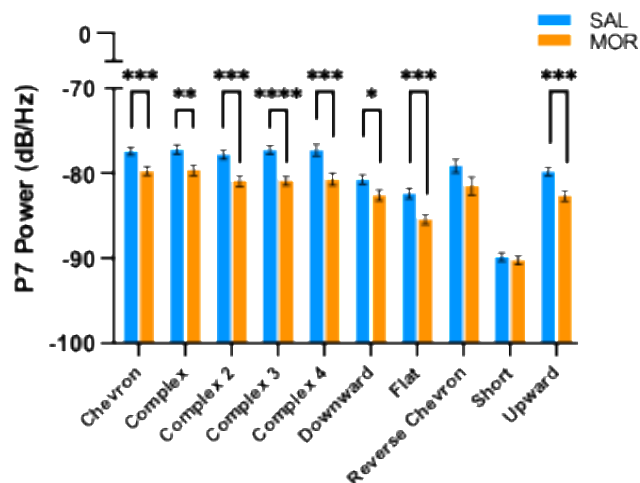

**C**

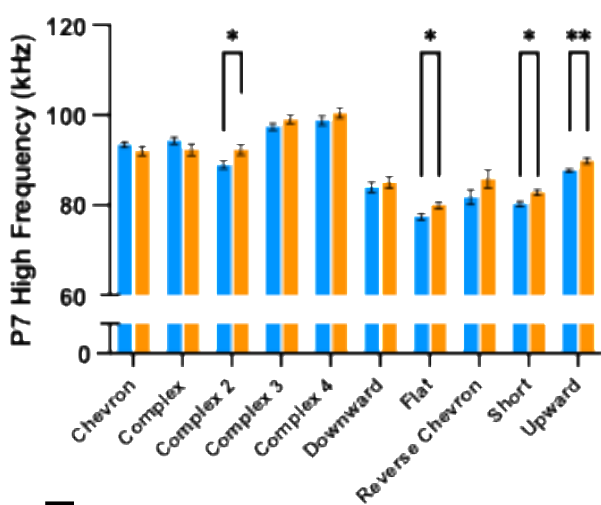

**D**

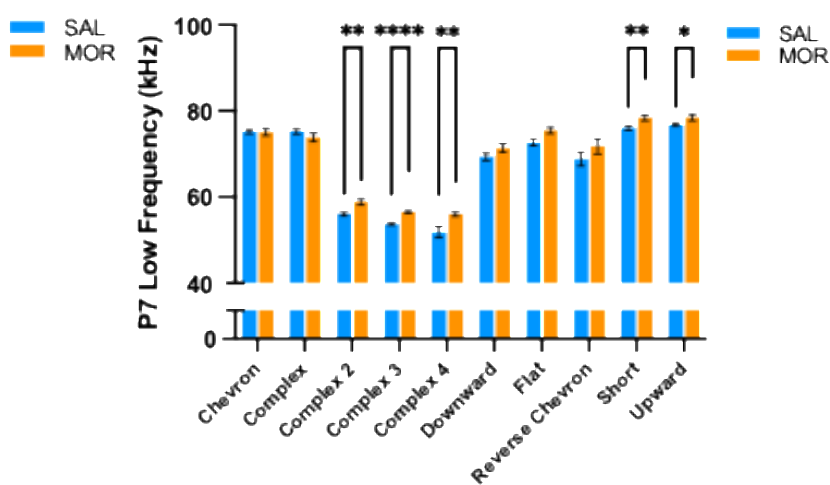

**E**

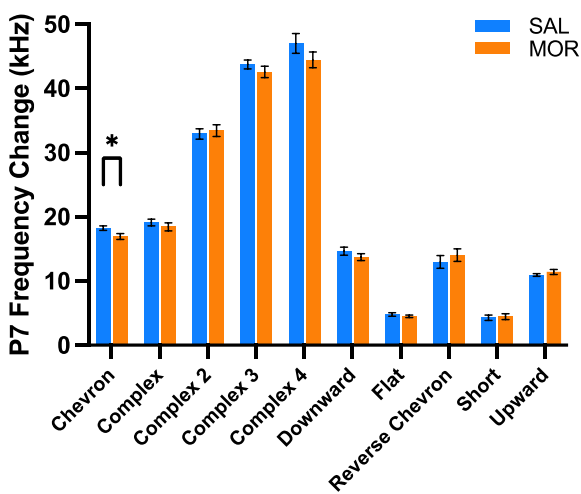

**F**

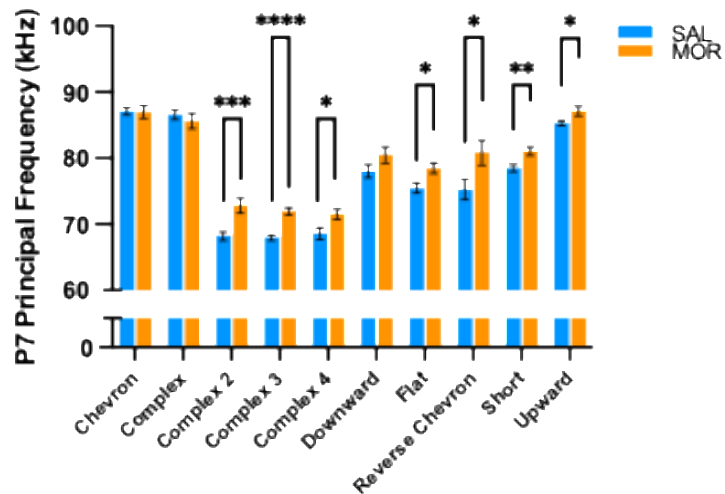

**G**

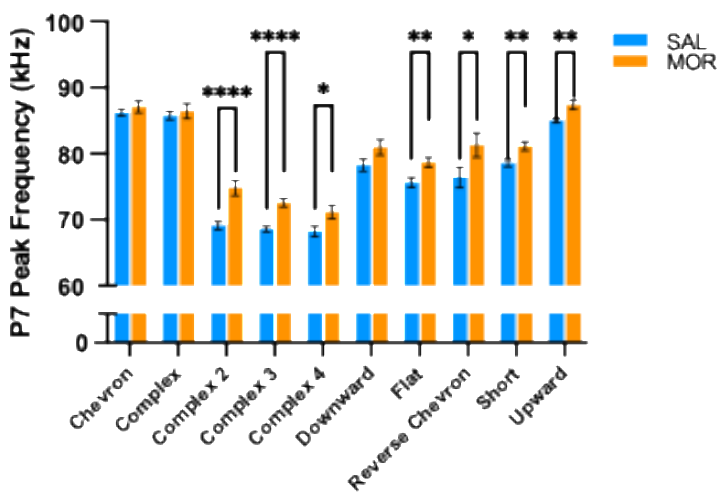

# Figure S5

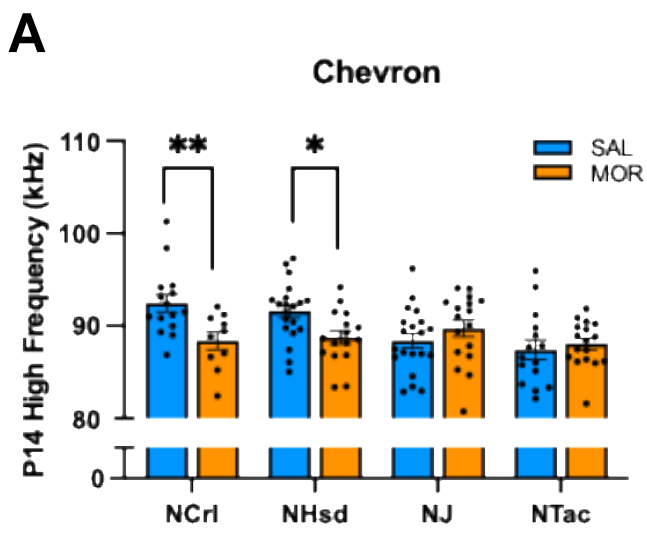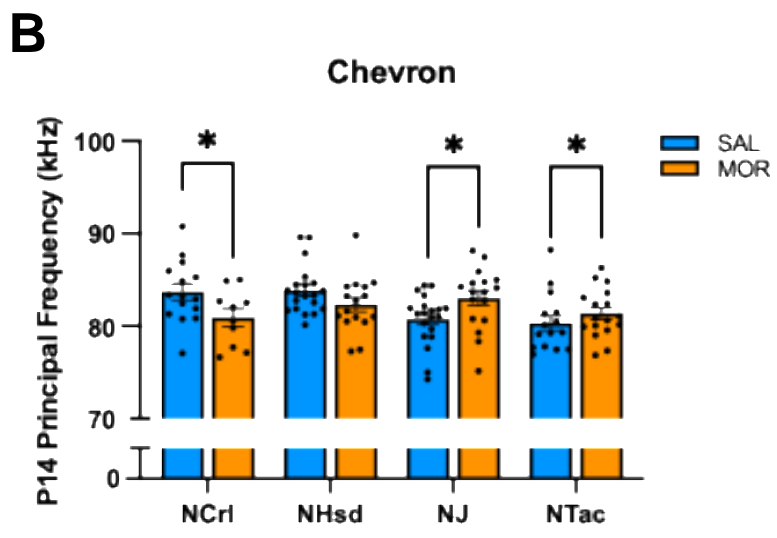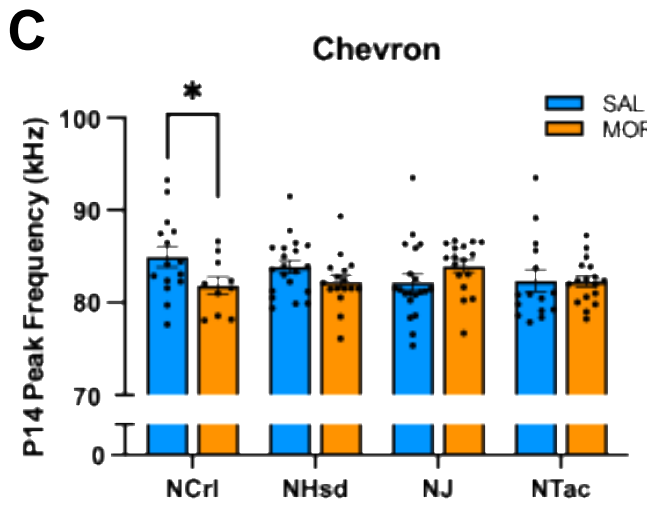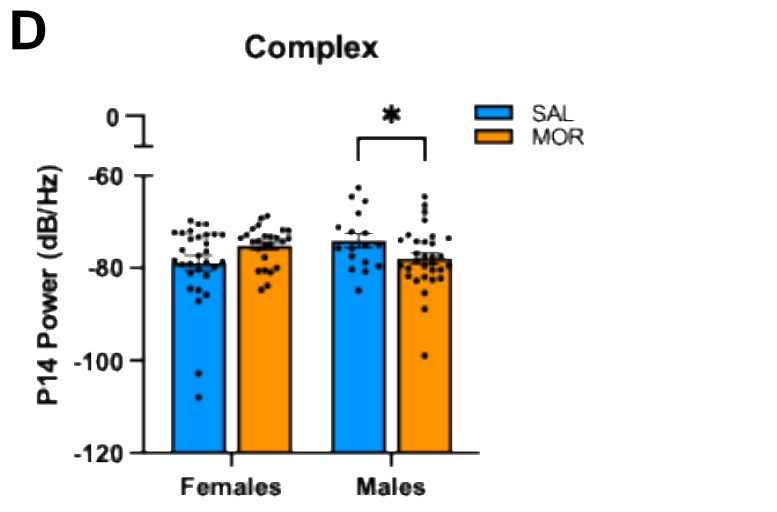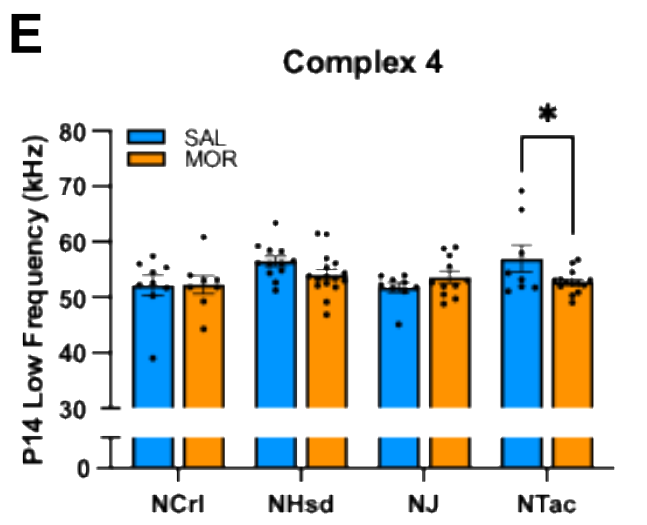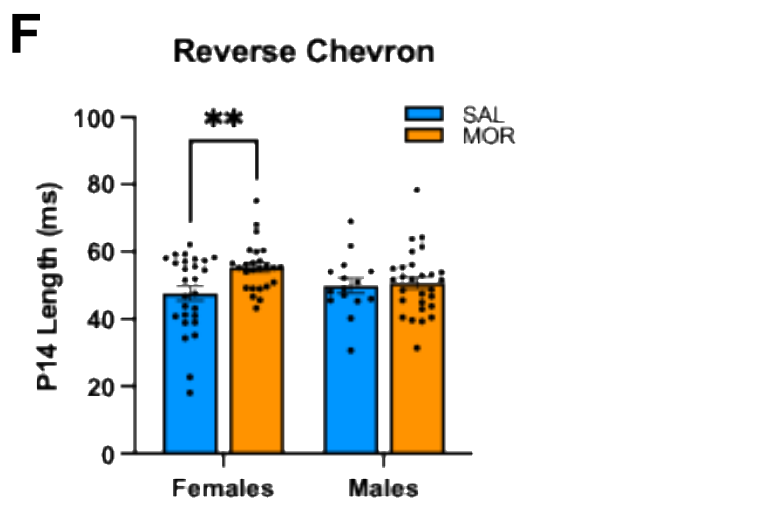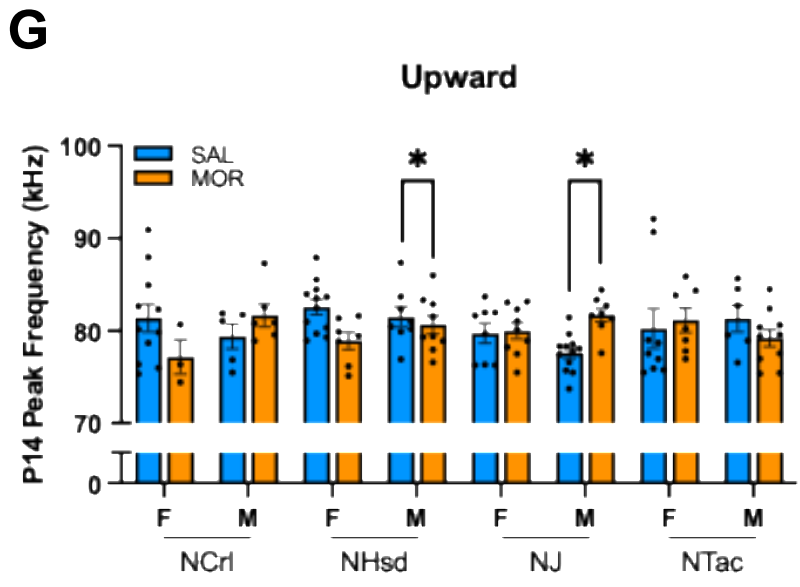

# Figure S6

## A

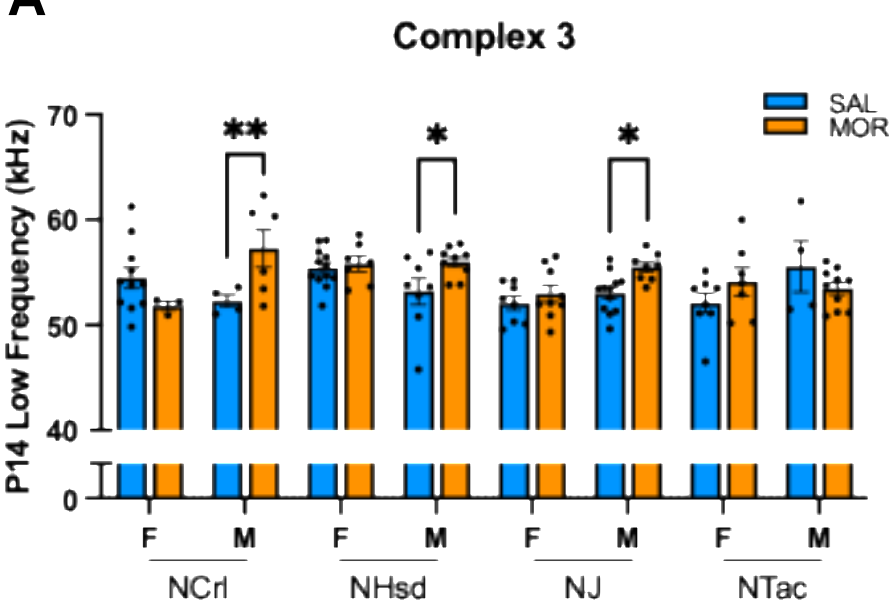

## B

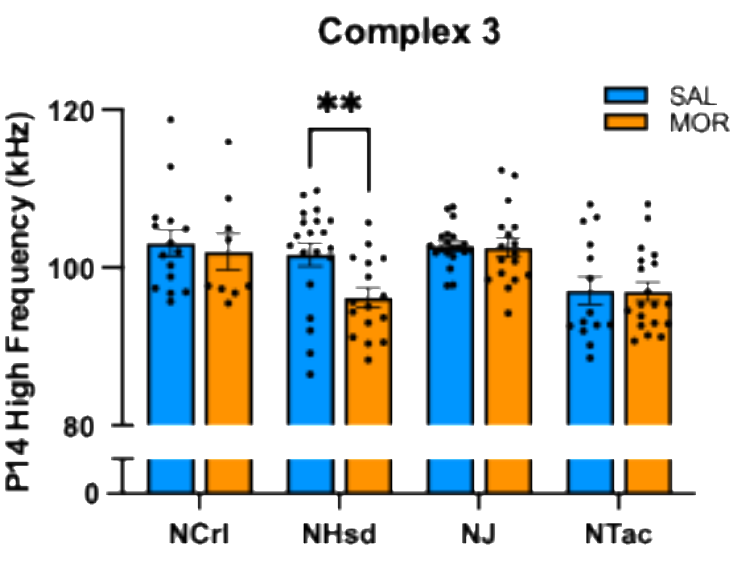

## C

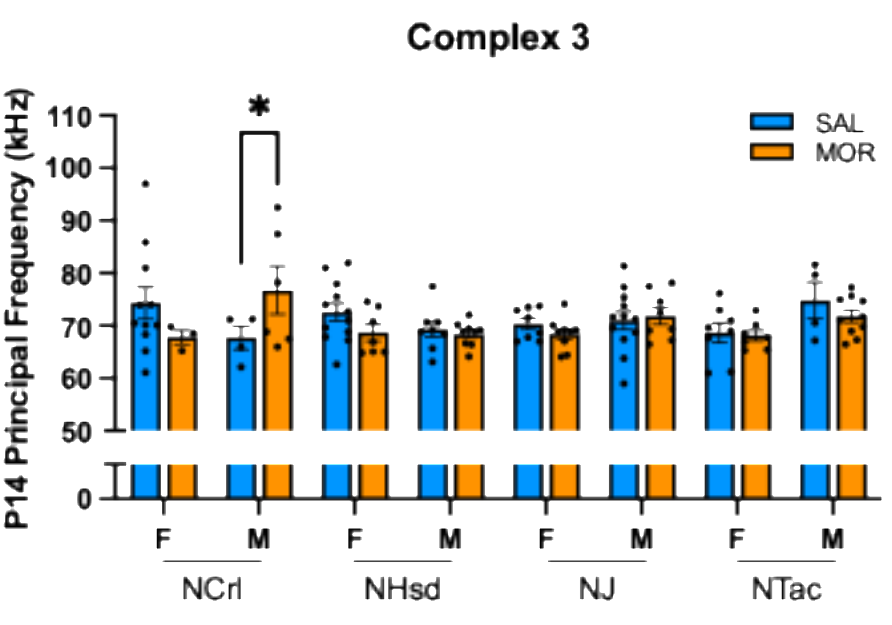

# Figure S7

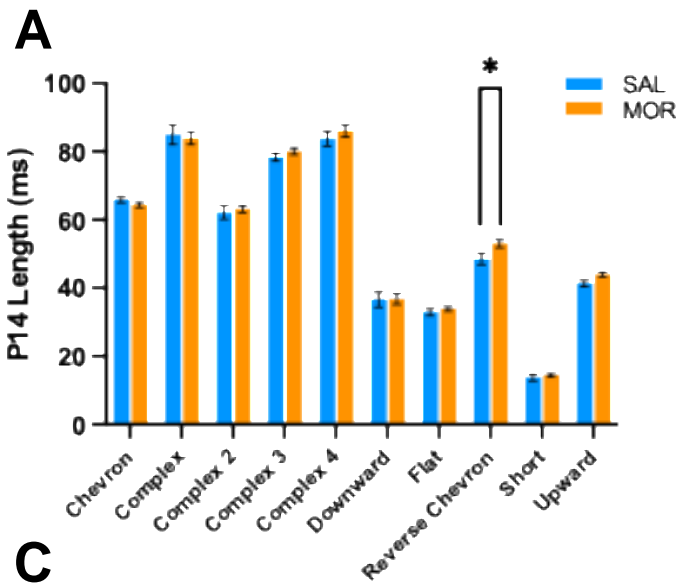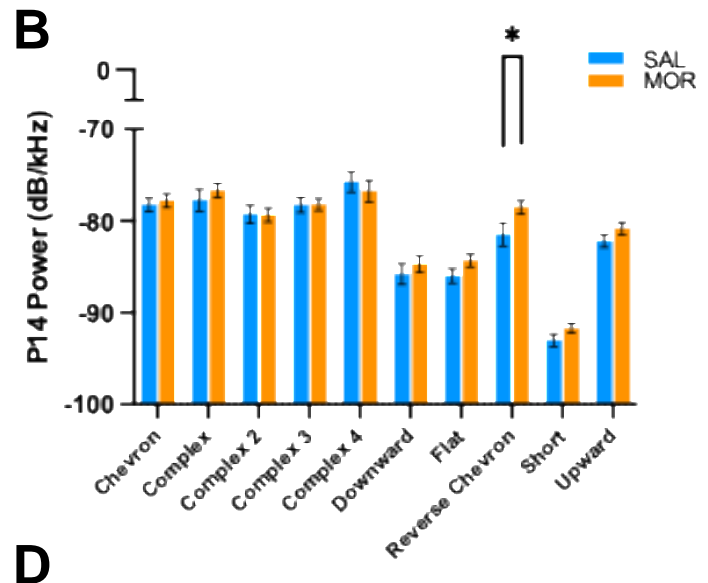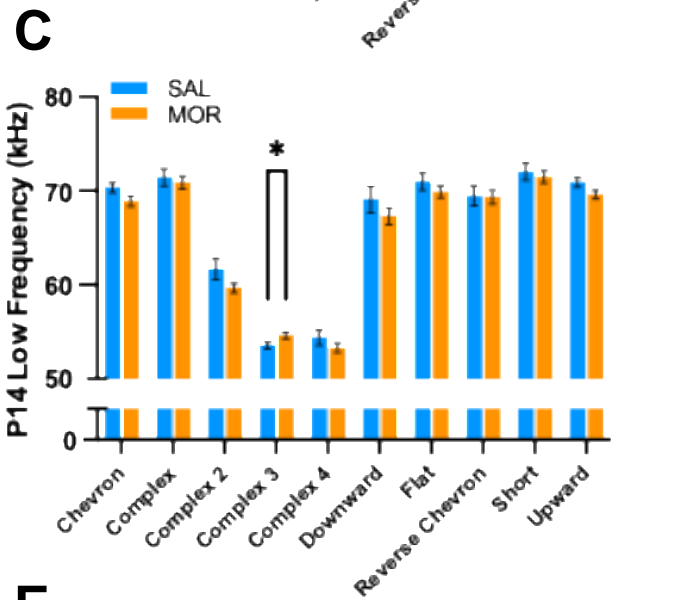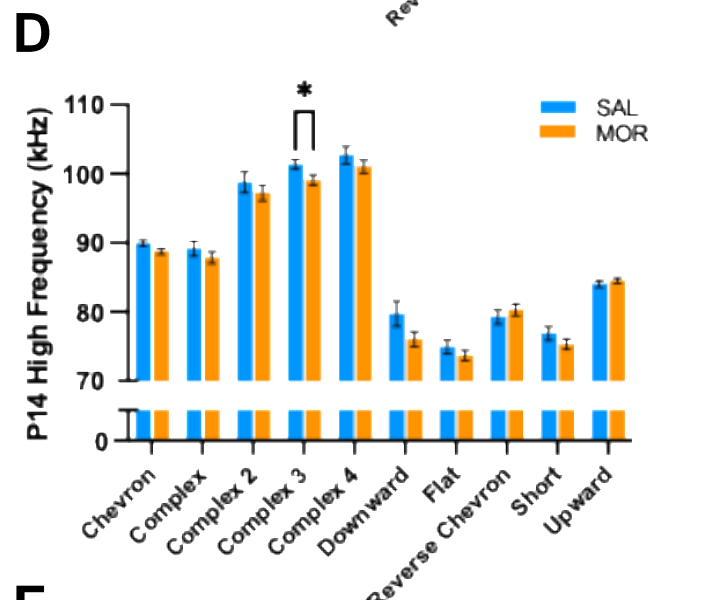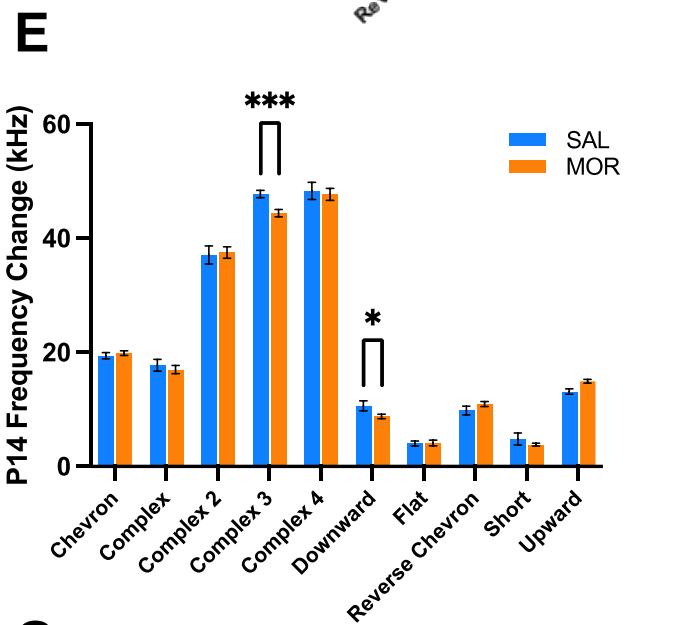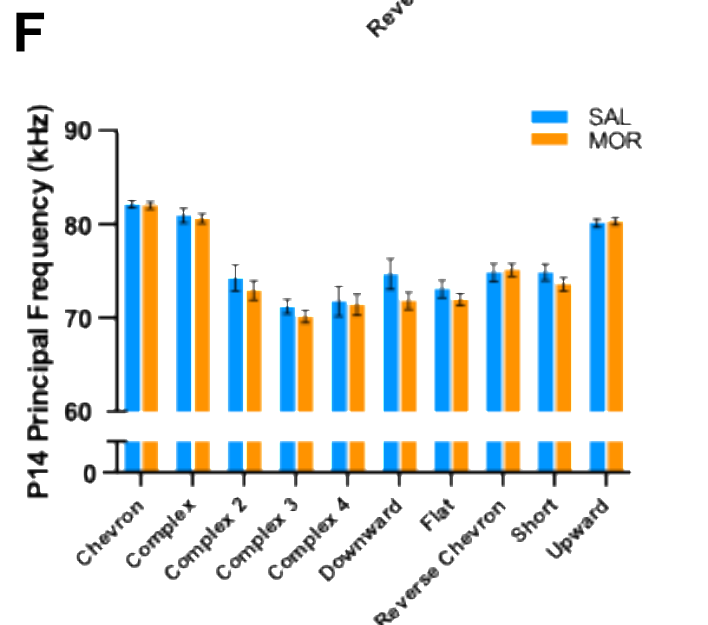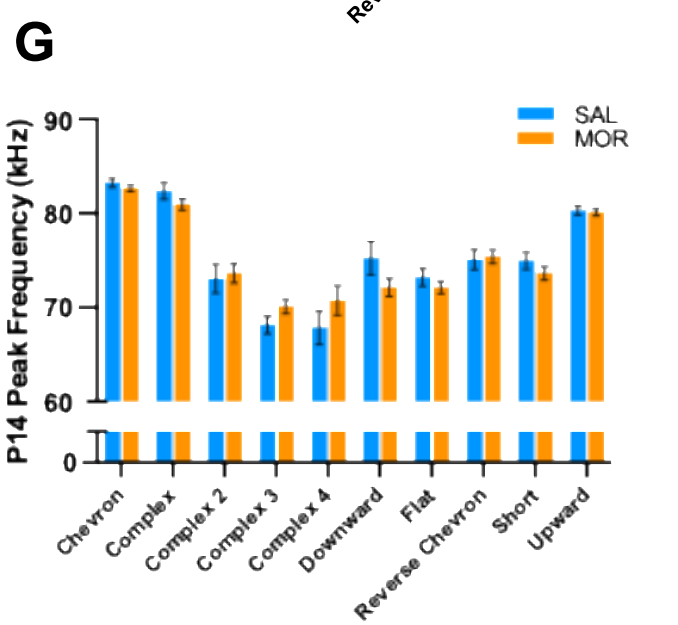

Supplement: media-3.pdf [file media-3.pdf]
